# Supplementary material for: Essential requirements for the detection and degradation of invaders by the Haloferax volcanii CRISPR/Cas system I-B
Source: PubMed Central journal article supplement — RNA Biol. 2013 Apr 17;10(5):865–74. doi: 10.4161/rna.24282 (PMC3737343; doi:10.4161/rna.24282), 2013-04-17
Supplement: rna-10-865-s01.pdf [file rna-10-865-s01.pdf]

## **Supplemental Material to:**

**Lisa-Katharina Maier, Sita Lange, Britta Stoll, Karina Haas,  
Susan Fischer, Eike Fischer, Elke Duchardt-Ferner,  
Jens Wöhnert, Rolf Backofen and Anita Marchfelder**

**Essential requirements for the detection  
and degradation of invaders by the  
*Haloferax volcanii* CRISPR/Cas system I-B**

**2013; 10(5)**

**<http://dx.doi.org/10.4161/rna.24282>**

**[www.landesbioscience.com/journals/rnabiology/article/24282/](http://www.landesbioscience.com/journals/rnabiology/article/24282/)**

## Supplementary figures and table

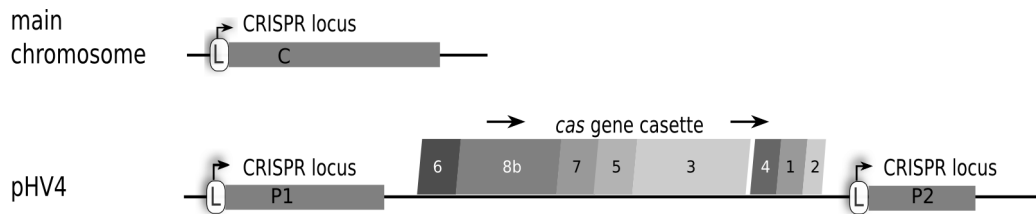

**Supplementary Figure 1. The *Haloferax volcanii* CRISPR/Cas system.** One CRISPR RNA locus (Locus C) is encoded on the main chromosome and contains 25 repeats and 24 spacers. The leader region (L) at the 5' end of the CRISPR locus contains the promoter (black arrow). Two CRISPR RNA loci (P1 and P2) are flanking the *cas* gene cluster on the mini chromosome pHV4. CRISPR locus P1 contains 17 repeats and 16 spacers, and locus P2 contains 12 repeats and 11 spacers. The *cas* gene cluster codes for the proteins Cas1, Cas2, Cas3, Cas4, Cas5, Cas6, Cas7 and Cas8b, the latter being the signature protein for subtype I-B.

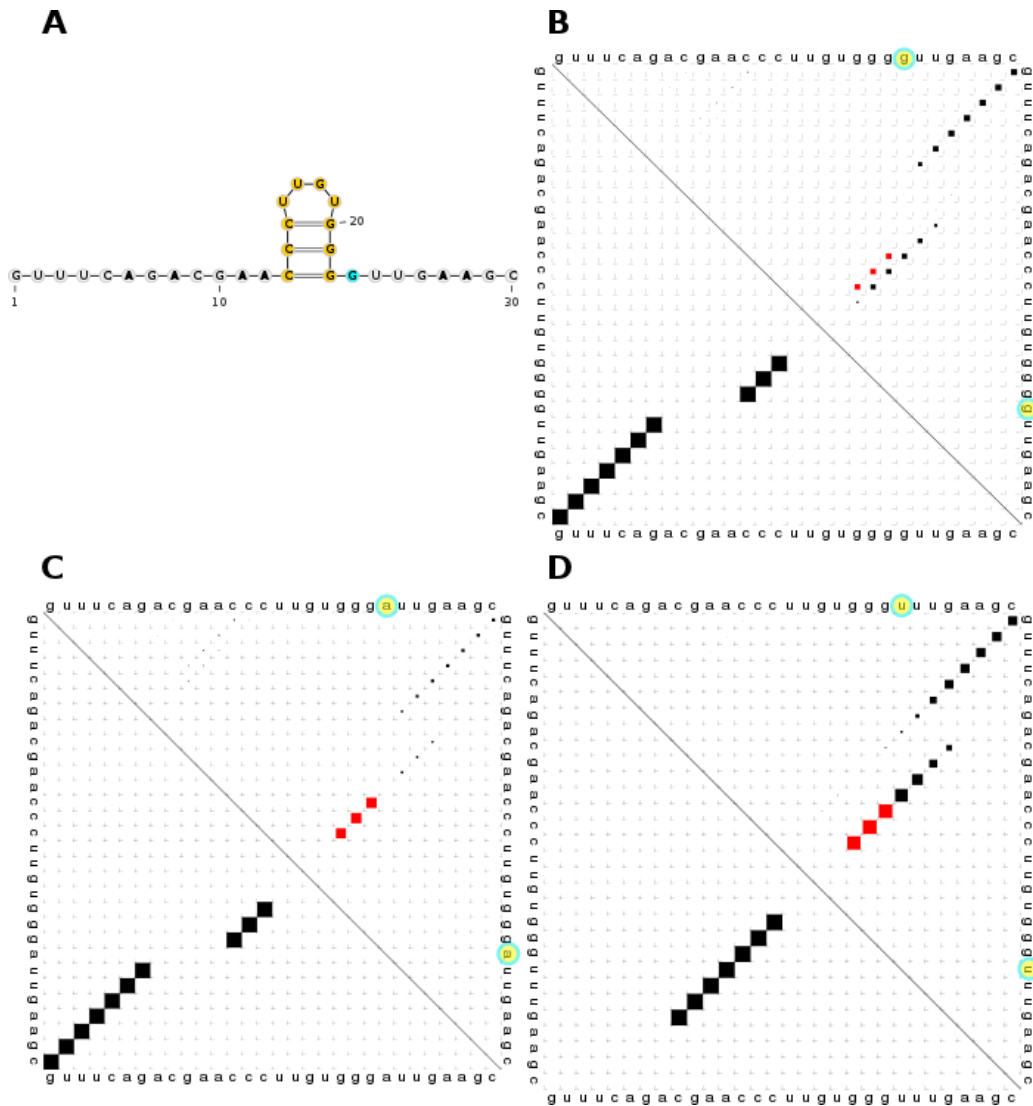

**Supplementary Figure 2. The structure motif containing three C-G base pairs forms in all CRISPR loci when considering the entire repeat-spacer context. A.** The conserved stem-loop is stable across all repeat loci (highlighted as red dots in B-D). **B.-D.** Dotplots to determine the influence of the array sequence on the individual repeat instances are shown. A dotplot is a matrix where the dot (i,j) corresponds to the base pair of the nucleotides at position i and j in the sequence and its size is relative to the base pair probability; the larger the dot, the more probable the base pair is. The lower triangle depicts a dot for the minimum free energy structure as predicted by RNAfold. The upper triangle depicts the average base pair probabilities for the repeat sequence in each instance in its respective repeat-spacer array. The array was folded with RNAplfold. This means that the upper triangle determines the average stability of possible base pairs across the entire array. This is in contrast to the traditional approach of just folding the repeat sequence on its own. However, the surrounding sequence influences the stability of each individual repeat instance in the array.

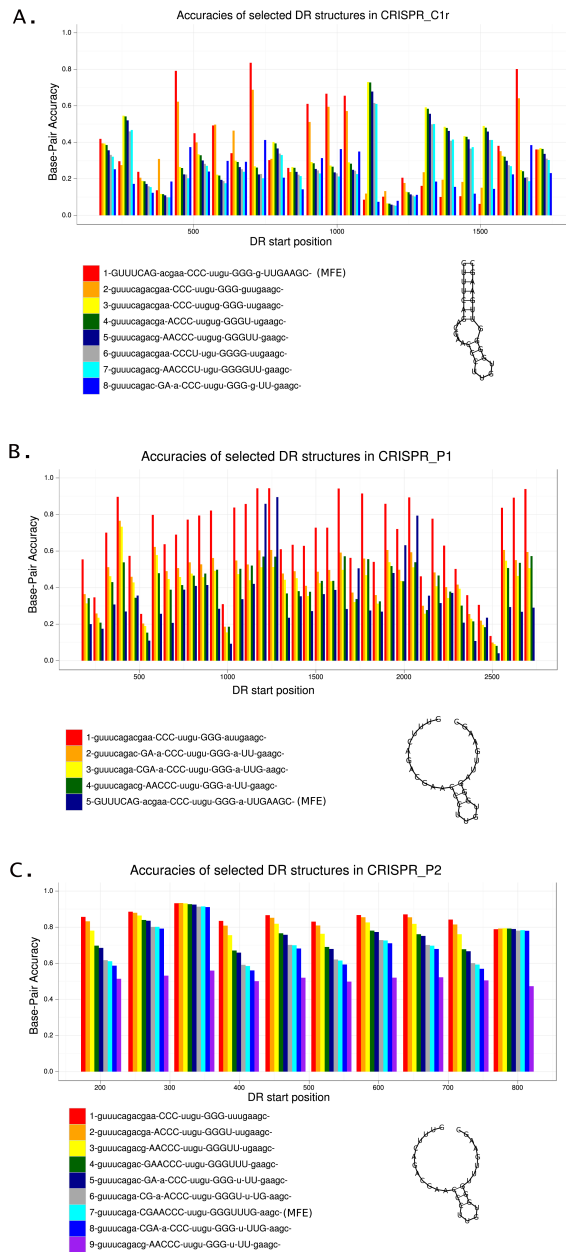

**Supplementary Figure 3. Repeat folding is influenced by the neighbouring spacer sequences.** For all repeats of all three spacer loci the potential of the repeat sequence to fold into a certain structure is shown. Depending on the adjacent spacer sequences the repeat is predicted to fold into the given structures with different stabilities (measured as the average base pair probability for a given structure, also called structure accuracy). Nucleotides involved in base pairing are shown in upper case letters. **A.** Folding of the repeats from CRISPR locus C. **B.** Folding of the repeats from CRISPR locus P1. **C.** Folding of the repeats from CRISPR locus P2. In each case the secondary structure of the structure coded in red is shown in the lower right corner.

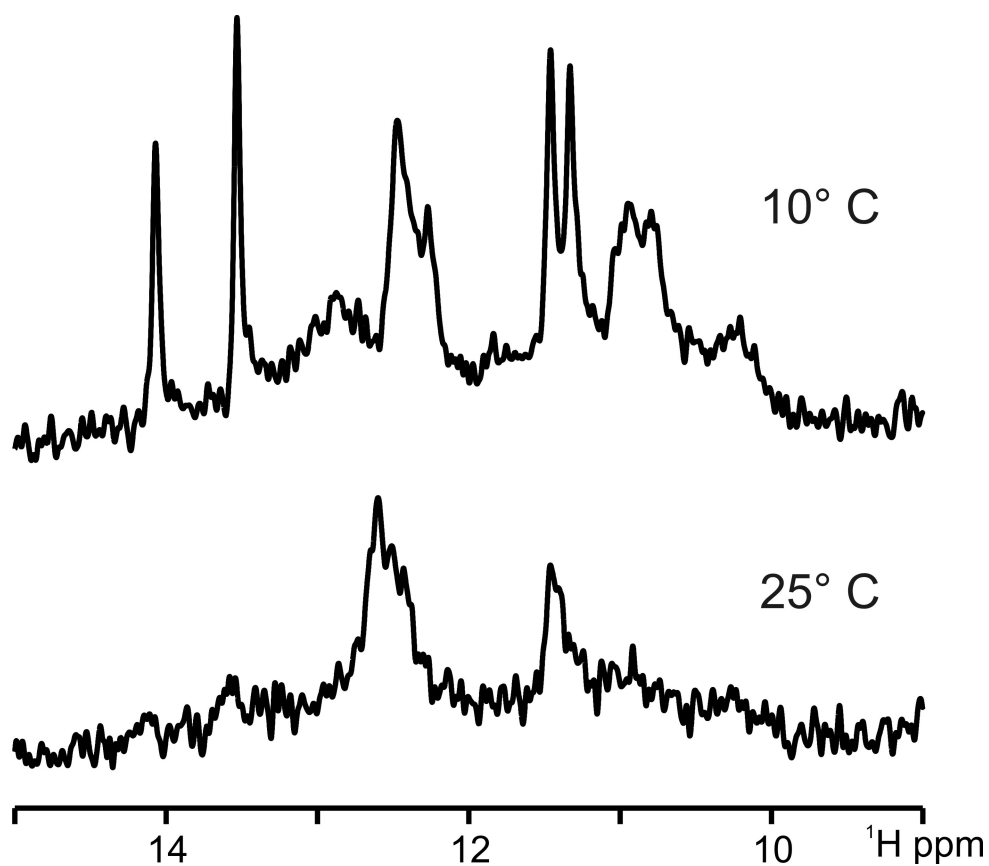

**Supplementary Figure 4. NMR analysis of the P1 repeat.** Imino proton region of 1D- $^1\text{H}$ -NMR-spectra at  $10^\circ\text{C}$  (top) and  $25^\circ\text{C}$  (bottom). At  $25^\circ\text{C}$  only two very broad imino proton signals barely above the noise level are visible indicating the complete absence of stable base pairing interactions. At  $10^\circ\text{C}$  additional signals become observable. However, the large line widths for some signals as well as the strong inhomogeneity in imino proton line-widths argue against the presence of a structurally well-defined fold of the repeat RNA.

**Supplementary Table 1. Strains, plasmids and primers used in this study.** The PAM sequences are underlined in the primer sequences, mutated nucleotides are shown in bold.

| <b>Strains</b>            | <b>Genotype</b>                                                                                                                                                                                   | <b>Source/Reference</b> |
|---------------------------|---------------------------------------------------------------------------------------------------------------------------------------------------------------------------------------------------|-------------------------|
| DH5 $\alpha$              | F- $\phi$ 80 <i>lacZ</i> $\Delta$ M15 $\Delta$ ( <i>lacZYA-argF</i> ) U169 <i>recA1 endA1 hsdR17</i> ( <i>rk-</i> , <i>mk+</i> ) <i>gal- phoA supE44 <math>\lambda</math>- thi-1 gyrA96 relA1</i> | (invitrogen)            |
| GM121                     | F- <i>dam-3 dcm-6 ara-14 fhuA31 galK2 galT22 hdsR3 lacY1 leu-6 thi-1 thr-1 tsx-78</i>                                                                                                             | (42)                    |
| H119                      | $\Delta$ <i>pyrE2</i> $\Delta$ <i>trpA</i> $\Delta$ <i>leuB</i>                                                                                                                                   | (26)                    |
| H26                       | $\Delta$ <i>pyrE2</i>                                                                                                                                                                             | (26)                    |
| <b>Plasmids</b>           | <b>Relevant properties</b>                                                                                                                                                                        | <b>Source/Reference</b> |
| pTA409                    | Shuttle vector with <i>pyrE2</i> marker and pHV1 replication origin                                                                                                                               | (24)                    |
| pTA409-PAM3               | Spacer P1.1. downstream of PAM3 (TTC)                                                                                                                                                             | (11)                    |
| pTA409-PAM9               | Spacer P1.1. downstream of PAM9 (ACT)                                                                                                                                                             | (11)                    |
| pTA409-PAM3-P1.X/P2.X/C.X | Spacers number X of locus P1, P2 or C preceded by PAM3(TTC)                                                                                                                                       | This study              |
| pTA409-PAM9-P1.X/P2.X/C.X | Spacers number X of locus P1, P2 or C preceded by PAM9(ACT)                                                                                                                                       | This study              |
| pTA352                    | Shuttle vector with <i>leuB</i> marker and pHV1 replication origin                                                                                                                                | (23)                    |
| pTA352-PAM3               | Spacer P1.1. downstream of PAM3 (TTC)                                                                                                                                                             | This study              |
| pTA352-PAM9               | Spacer P1.1. downstream of PAM9 (ACT)                                                                                                                                                             | This study              |
| pTA232                    | Shuttle vector with <i>leuB</i> marker and pHV2 replication origin                                                                                                                                | (26)                    |
| pTA232-PAM3               | Spacer P1.1. downstream of PAM3 (TTC)                                                                                                                                                             | This study              |
| pTA232-PAM9               | Spacer P1.1. downstream of PAM9 (ACT)                                                                                                                                                             | This study              |
| pTA409-SEED1              | Spacer P1.1 mutated at position 1 downstream of PAM9 (ACT)                                                                                                                                        | This study              |
| pTA409-SEED2-25           | Spacer P1.1 mutated at positions indicated in Figure 3 downstream of PAM9 (ACT)                                                                                                                   | This study              |
| <b>Primers</b>            | <b>Sequence</b>                                                                                                                                                                                   | <b>Source/Reference</b> |
| VPAM9                     | <u>TACTGCAGGCATCTCGACCGGCGACCTCC</u>                                                                                                                                                              | (11)                    |
| VPAM9mutP1                | TACT <b>A</b> CAGGCATCTCGACCGGCGACCTCC                                                                                                                                                            | This study              |
| VPAM9mut1(P2)             | <u>TACTG</u> <b>A</b> AAGGCATCTCGACCGGCGACCTCC                                                                                                                                                    | This study              |
| VPAM9mutP3                | TACTG <b>C</b> CGGCATCTCGACCGGCGACCTCC                                                                                                                                                            | This study              |
| VPAM9mutP4                | <u>TACTGCATGCATCTCGACCGGCGACCTCC</u>                                                                                                                                                              | This study              |
| VPAM9mutP5                | <u>TACTGCAG</u> <b>A</b> CATCTCGACCGGCGACCTCC                                                                                                                                                     | This study              |
| VPAM9mutP6                | <u>TACTGCAGG</u> <b>T</b> ATCTCGACCGGCGACCTCC                                                                                                                                                     | This study              |
| VPAM9mutP7                | <u>TACTGCAGGC</u> <b>G</b> TCTCGACCGGCGACCTCC                                                                                                                                                     | This study              |
| VPAM9mutP8                | TACTGCAGGC <b>A</b> GCTCGACCGGCGACCTCC                                                                                                                                                            | This study              |
| VPAM9mutP9                | <u>TACTGCAGGCAT</u> <b>A</b> TCTCGACCGGCGACCTCC                                                                                                                                                   | This study              |
| VPAM9mutP10               | TACTGCAGGCAT <b>C</b> GACCGGCGACCTCC                                                                                                                                                              | This study              |
| VPAM9mutP11               | <u>TACTGCAGGCATCT</u> <b>A</b> GACCGGCGACCTCC                                                                                                                                                     | This study              |
| VPAM9mutP12               | <u>TACTGCAGGCATCTCT</u> <b>A</b> CCGGCGACCTCC                                                                                                                                                     | This study              |
| VPAM9mutP13               | TACTGCAGGCATCT <b>C</b> G <b>C</b> CGGCGACCTCC                                                                                                                                                    | This study              |
| VPAM9mutP14               | <u>TACTGCAGGCATCTCGAT</u> <b>C</b> GGCGACCTCC                                                                                                                                                     | This study              |

|                   |                                  |            |
|-------------------|----------------------------------|------------|
| VPAM9mutP15       | TACTGCAGGCATCTCGACAGGCGACCTCC    | This study |
| VPAM9mutP16       | TACTGCAGGCATCTCGACCAGCGACCTCC    | This study |
| VPAM9mut3(P17)    | TACTGCAGGCATCTCGACCGACGACCTCC    | This study |
| VPAM9mutP18       | TACTGCAGGCATCTCGACCGGAGACCTCC    | This study |
| VPAM9del17        | TACTGCAGGCATCTCGACCGCGACCTCC     | This study |
| VPAM9P12,17       | TACTGCAGGCATCTCTACCGACGACCTCC    | This study |
| Spacer1rev        | CAAAGTGTTCCGGGAGGTCGCCGGTC       | (11)       |
| HmutP12           | ATCAAAGTGTTCCGGGAGGTCGCCGGTA     | This study |
| HmutP13           | ATCAAAGTGTTCCGGGAGGTCGCCGGCC     | This study |
| HmutP14           | ATCAAAGTGTTCCGGGAGGTCGCCGATC     | This study |
| HmutP15           | ATCAAAGTGTTCCGGGAGGTCGCCGTGTC    | This study |
| HmutP16           | ATCAAAGTGTTCCGGGAGGTCGCTGGTC     | This study |
| HPAM9mut3(P17)    | ATCAAAGTGTTCCGGGAGGTCGTCGGTC     | This study |
| HPAM9mut2(P36)    | TACTCGAAGTGTTCCGGGAGGTCGCCGGTC   | This study |
| HmutP18           | ATCAAAGTGTTCCGGGAGGTCCTCCGGTC    | This study |
| Hdel17            | ATCAAAGTGTTCCGGGAGGTCGCCGGTC     | This study |
| HmutP12,17,36     | TACGAAGTGTTCCGGGAGGTCGTCGGTA     | This study |
| HmutP12,17,26,36  | ATCGAAGTGTTCCCTGGAGGTCGTCGGTA    | This study |
| HmutP17,36        | ATCGAAGTGTTCCGGGAGGTCGTCGGTC     | This study |
| HmutP31-33        | ATCAAAACATTCCGGGAGGTCGCCGGTC     | This study |
| HmutP31-37        | ATTGCGACATTCCGGGAGGTCGCCGGTC     | This study |
| HmutP35-37        | ATTGCAGTGTTCCGGGAGGTCGCCGGTC     | This study |
| V PAM3 P1-Mitte   | TTTCGGGAGTGTATGCGATATCCCTTAAAC   | This study |
| V PAM9 P1-Mitte   | TACTGGGAGTGTATGCGATATCCCTTAAAC   | This study |
| H PAM9 P1-Mitte   | AAGTAGGGGGTTTTAAGGGATATCG        | This study |
| V PAM3 P1- Ende   | TTTCGTCGCTCGCGGGATCGACATCATCGC   | This study |
| V PAM9 P1- Ende   | TACTGTCGCTCGCGGGATCGACATCATCGC   | This study |
| H PAM9 P1- Ende   | CATCGCCTTGAGCGCGATGATGTGTCGATC   | This study |
| V PAM3 P2-Sp1     | TTTCTCGGGGTGGACGTTCTGCCGGGCATAG  | This study |
| V PAM9 P2- SP1    | TACTTCCGGGGTGGACGTTCTGCCGGGCATAG | This study |
| H PAM9 P2-SP1     | CAATATATTGCCTATGCCCGGCAG         | This study |
| V PAM3 P2-Sp6     | TTTCTGCTAGTCGGACCGAGGGAGGAAGC    | This study |
| V PAM9 P2-SP6     | TACTTGCTAGTCGGACCGAGGGAGGAAGC    | This study |
| H PAM9 P2-SP6     | GATCCGAGAGGCTTCCCTCCCTCG         | This study |
| VPAM3 P2Sp8       | TTTCTGTGGGAACAAGCAATAGAGG        | This study |
| VPAM9 P2Sp8       | TACTTGTGGGAACAAGCAATAGAGG        | This study |
| H P2Sp8           | CATCCTTCAAAGTCCTCTATTGCTTGT      | This study |
| V PAM3 P2-SP10    | TTTCGGCGACAACGACGGCAACCTCGAAG    | This study |
| V PAM9 P2-SP10    | TACTGGCGACAACGACGGCAACCTCGAAG    | This study |
| H PAM9 P2-SP10    | AGGCGGCGCAGACTTCGAGGTTGC         | This study |
| V PAM3 P2-SP10    | TTTCGGCGACAACGACGGCAACCTCGAAG    | This study |
| V PAM9 P2-SP10    | TACTGGCGACAACGACGGCAACCTCGAAG    | This study |
| H PAM9 P2-SP10    | AGGCGGCGCAGACTTCGAGGTTGC         | This study |
| V PAM3 C-Sp1      | TTTCGAGGAAAGGTCCGAAGATGCCCTCG    | This study |
| V PAM9 C- SP1 NEU | TACTGAGGAAAGGTCCGAAGATGCCCTCG    | This study |
| H PAM9 C- SP1 NEU | ATTTTCTGAGATTTCGAGGGCATCTTC      | This study |
| VPAM3 CSp9        | TTTCGCGGAGGTCGCTGACAGCAACG       | This study |
| VPAM9 CSp9        | TACTGCGGAGGTCGCTGACAGCAACG       | This study |
| H CSp9            | CGCTCGATACCGTCGTTGCTGTCAGCGA     | This study |

|                   |                                |            |
|-------------------|--------------------------------|------------|
| V PAM3 C-Sp10     | TTTCAAATCCTCGATTACTACGAGATCCC  | This study |
| VPAM9 SP10C3      | TACTAAAATCCTCGATTACTACGAGATCCC | This study |
| H-SP10C3          | ATAATCTTCCGTGGGATCTCGTAGTAATC  | This study |
| V PAM3 C-SP24 NEU | TTTCTCGACTAACGTGGTCTCGTTCCGG   | This study |
| V PAM9 C-SP24 NEU | TACTTCGACTAACGTGGTCTCGTTCCGG   | This study |
| H PAM9 C-SP24 NEU | ATATCCACCGTGCCGCCGAACGAGACCA   | This study |
